# Supplementary material for: Automated tracking of level of consciousness and delirium in critical illness using deep learning
Source: Springer Nature journal article supplement (doi:10.1038/s41746-019-0167-0), 2019-09-09
Supplement: 41746_2019_167_MOESM1_ESM.pdf [file 41746_2019_167_MOESM1_ESM.pdf]

## Supplementary Materials for

### “Automated Tracking of Level of Consciousness and Delirium in Critical Illness using Deep Learning”

Haoqi Sun, PhD<sup>1</sup>, Eyal Kimchi, MD, PhD<sup>1</sup>, Oluwaseun Akeju, MD<sup>2</sup>, Sunil B. Nagaraj, PhD<sup>3</sup>, Lauren M. McClain, BA<sup>1</sup>, David W. Zhou, MSc<sup>2</sup>, Emily Boyle, BSc<sup>1</sup>, Wei-Long Zheng, PhD<sup>1</sup>, Wendong Ge, PhD<sup>1</sup>, M. Brandon Westover, MD, PhD<sup>1</sup>

<sup>1</sup> Department of Neurology, Massachusetts General Hospital, Boston, MA, USA

<sup>2</sup> Department of Anesthesia, Critical Care, and Pain Medicine, Massachusetts General Hospital, Boston, MA, USA

<sup>3</sup> Department of Clinical Pharmacy and Pharmacology, University Medical Center Groningen, University of Groningen, The Netherlands

## Supplementary Methods

The overall deep learning model consisted of a feed-forward network implemented using convolution neural network (CNN) for extracting features from the EEG waveform, followed by a recurrent neural network (RNN) implemented using long-short term memory (LSTM) for providing the temporal context from subsequent segments. The convolution layers use filters to “scan” the EEG waveform, if the EEG looks like a filter, the convolved value is large. There are multiple filters per convolution layer, each “scanning” for a different pattern. Max-pooling is a process of down-sampling the output of the convolution layer by extracting the maximum convolved value in a given segment of data.

The CNN contains an initial convolution layer and 8 resblocks. Each resblock consists of two batch normalization layers, two leaky rectified linear units (leaky ReLU), two dropout layers, two convolution layers, and a max-pooling layer if required to subsample the input. The max-pooling layer is on the residual connection (skip layer connection). The network increases its number of filters by 32 for every 4 resblocks, and subsamples the signal 4 times for every 2 resblocks. Therefore, the sequence of output size of each hidden layer is: (2 x 250) (this is the input EEG size with 2 channels and 4 seconds, 62.5Hz) → (32 x 250) (after the initial convolution layer) → (32 x 63) → (32 x 63) → (32 x 16) → (64 x 16) → (64 x 4) → (64 x 4) → (64 x 2) → (96 x 2). Finally it is flattened to be (192). If CNN is used as a feature extractor for LSTM, these 192 features are fed to the LSTM; otherwise the features are fed to an output layer. The LSTM has 2 layers with 16 and 4 hidden nodes in each layer for RASS; and 8 and 4 hidden nodes for CAM-ICU.

The output layer for RASS is an ordinal regression layer, implemented using ordistic regression (ordinal generalization of logistic regression)<sup>1</sup> to learn both the weights and thresholds. The output of the ordinal regression was a continuous “z-score”, and if needed, we applied the learned thresholds to discretize it into RASS levels. The output layer for the CAM-ICU was logistic regression since it is a binary

classification problem. The LSTM outputs a number for each 4s window. We take the average of these numbers across the 1h as the final output.

We used PyTorch (<https://pytorch.org/>), the community-based open-source deep learning platform, written in Python (<https://www.python.org/>), as our coding tool. The results are generated using a desktop computer with 64GB memory, 24 CPUs and 4 Nvidia GTX 1080 Ti GPUs with 11GB memory each. The code that support the findings of this study are available from the corresponding author upon reasonable request.

### Supplementary Figures

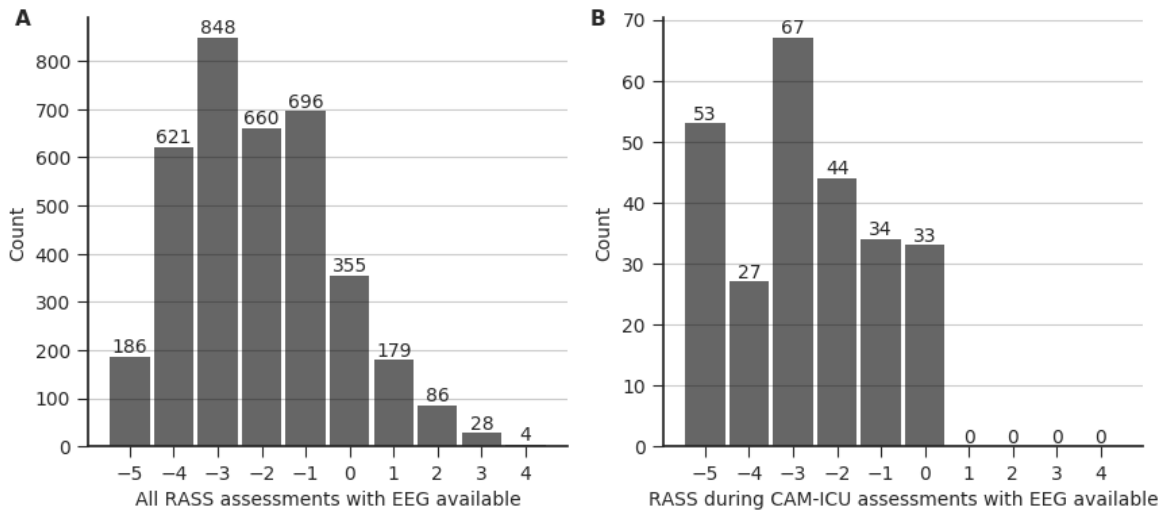

**Supplementary Figure 1.** The distribution of RASS scores in (A) All assessment with EEG available. (B) CAM-ICU assessments with EEG available.

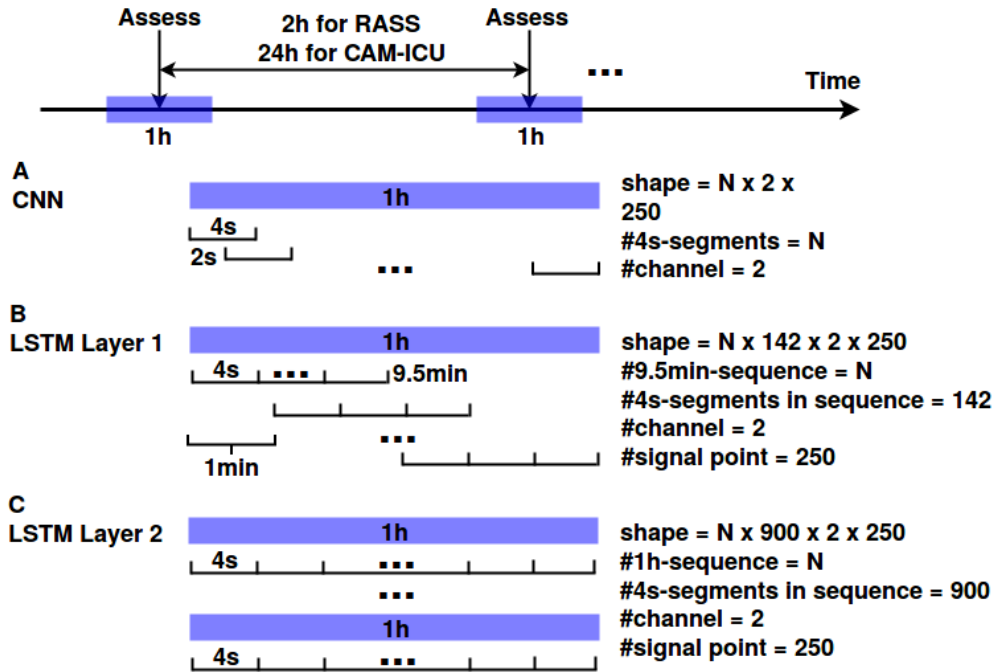

**Supplementary Figure 2.** The illustration of data preparation for training the model. (A) for training the CNN network; (B) for training the first layer of LSTM; and (C) for training the second layer of LSTM.

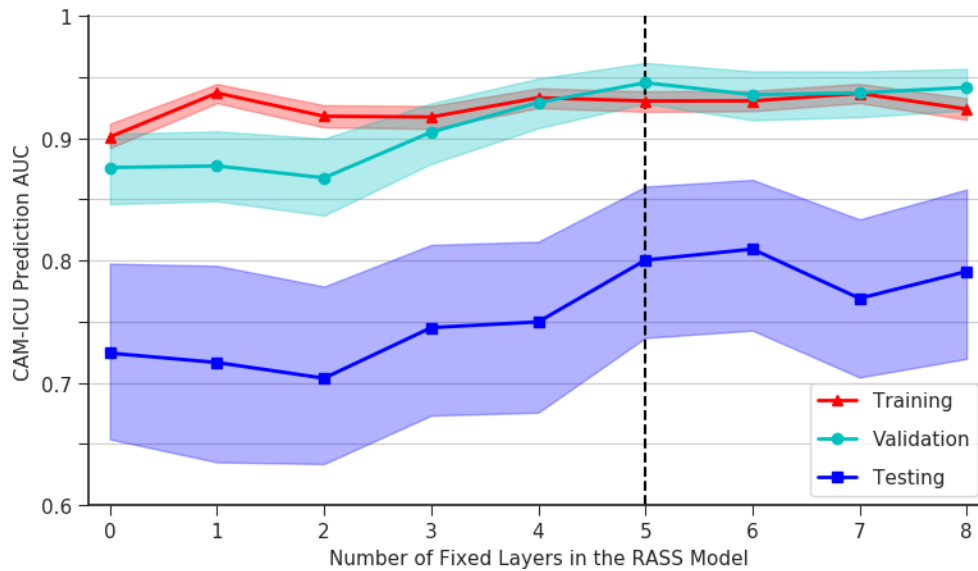

**Supplementary Figure 3.** The training, validation and testing AUC for CAM-ICU prediction when fixing different number of layers in the CNN model from RASS prediction. The dashed vertical line shows that when fixing the first 5 layers, the model has the maximum validation AUC, therefore we should use this setting.

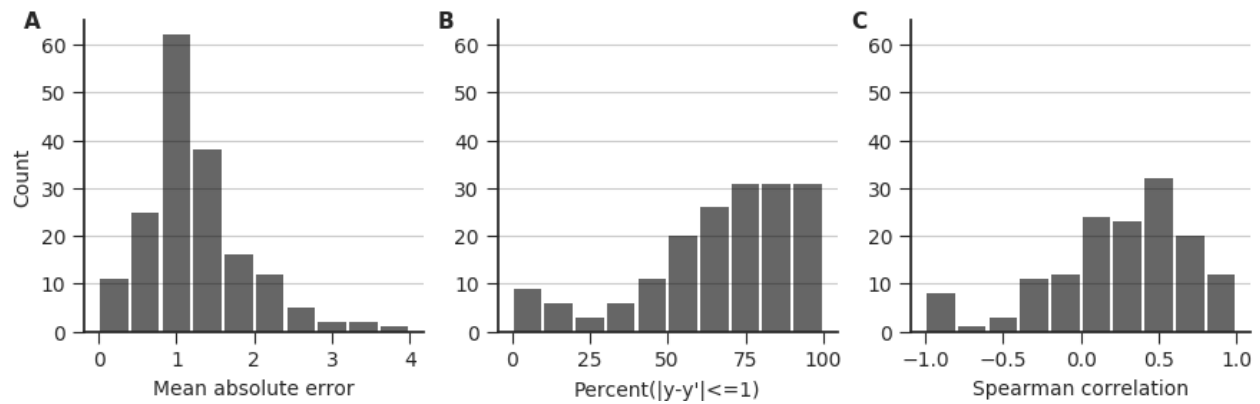

**Supplementary Figure 4.** (A) Histogram of the mean absolute error across all patients from the testing sets of all 10 folds. (B) Histogram of the percentage of agreement when allowing 1 level error in the prediction. (C) Histogram of the Spearman correlation between the true RASS and the predicted z-score.

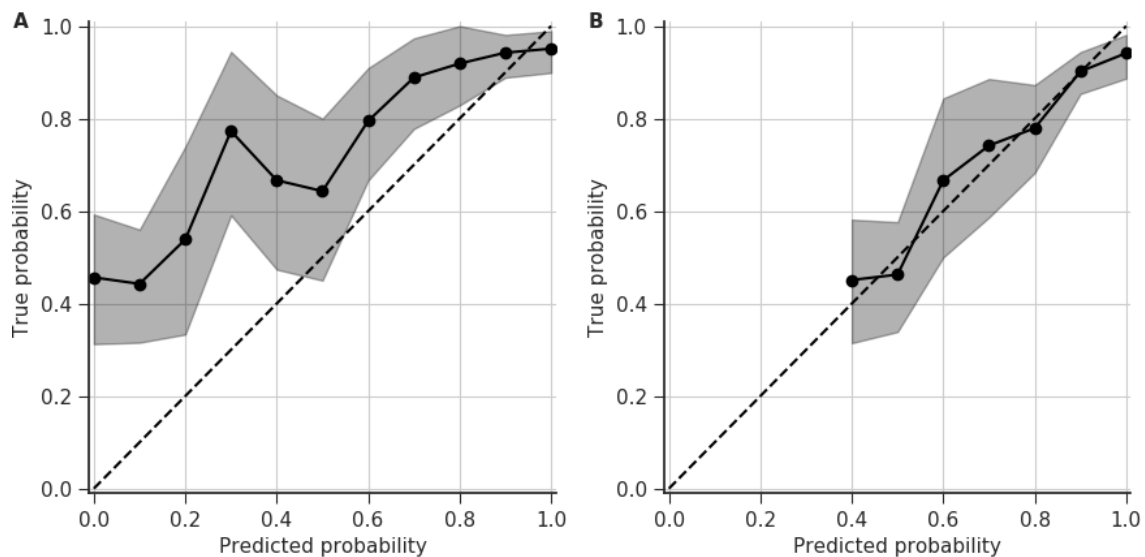

**Supplementary Figure 5.** Calibration curve for delirium. (A) The x-axis is the predicted probability. The y-axis is the probability of true CAM-ICU=1 when their predicted probability is within the range of predicted probability  $\pm 0.1$ . The calibration error is defined as the mean absolute difference compared to the diagonal perfect line. The 95% confidence band is obtained by bootstrapping 1000 times. The calibration error is 0.24 (95% CI 0.18 – 0.30). The calibration can be improved as in (B) by doing re-calibration, which learns an optimal transformation so that the transformed predicted probability achieves minimum calibration error. The calibration error after re-calibration is 0.040 (95% CI 0.032 – 0.094).

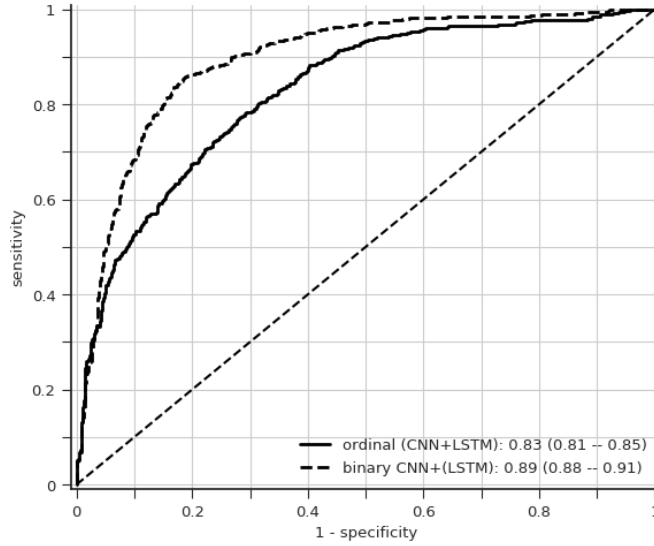

**Supplementary Figure 6.** (Solid line) The AUC between true RASS (binary, -5, -4 vs. -1, 0) and the predicted probability of being RASS -1 or 0 obtained by ordinal regression, using only assessments with RASS -5, -4, -1, 0. (Dashed line) Similar, but the predicted probability is obtained by training a binary classifier. As expected, binary classification achieves higher AUC than ordinal regression ( $p < 0.05$  by bootstrapping 1000 times), since binary classification focuses on the separation between RASS -5, -4 vs. -1, 0; while ordinal regression focuses on the relative ordering of all RASS levels.

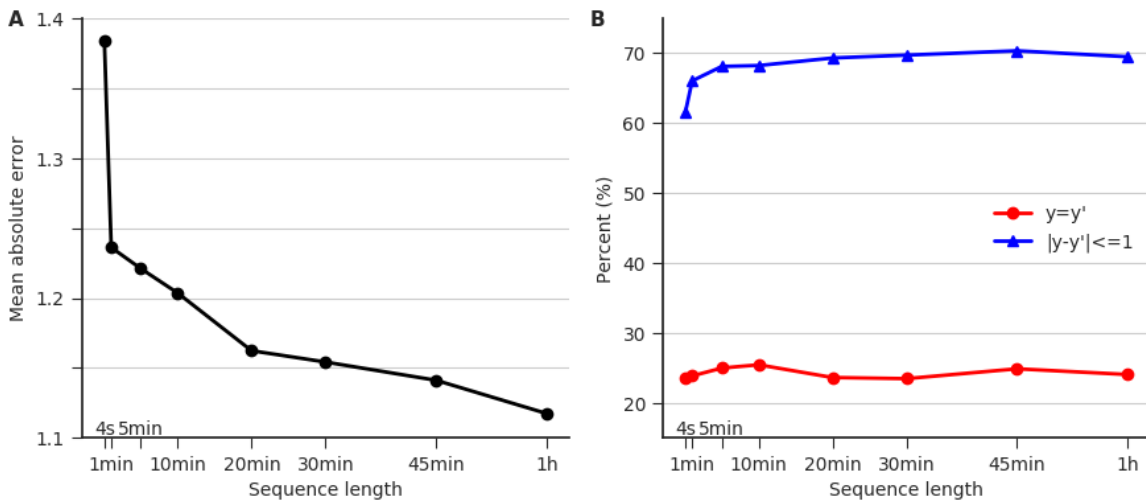

**Supplementary Figure 7.** The testing performance for different sequence lengths. The y-axis shows the median across all patients. The leftmost point at 4s is the performance when 4s-segments are fed to CNN without LSTM without any averaging of the final result.

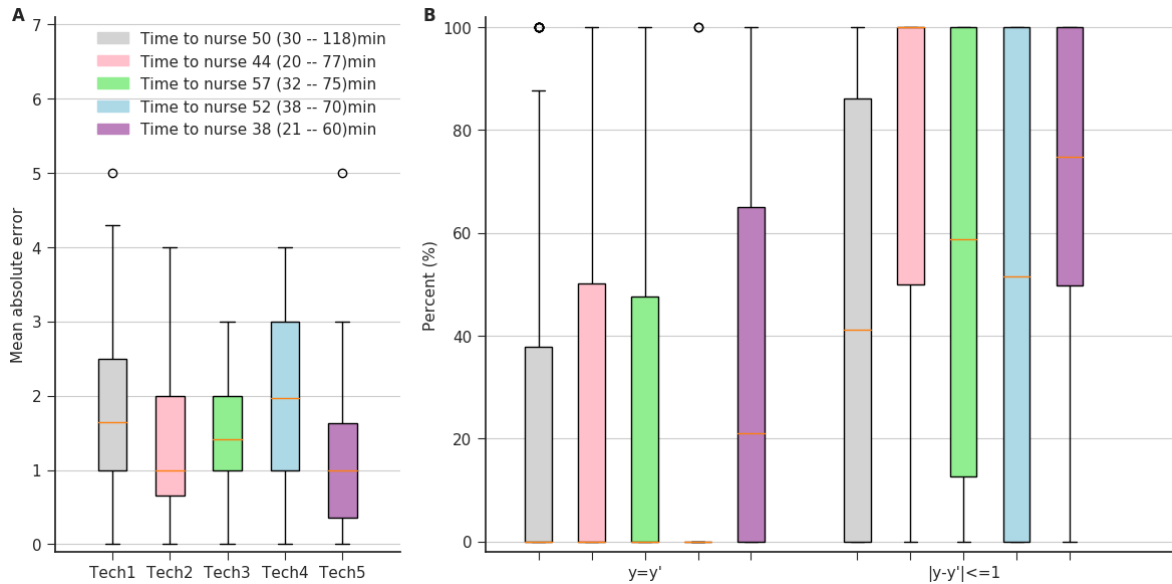

**Supplementary Figure 8.** (A) The boxplot of the mean absolute error for each clinical research technician vs. nurse per patient. (B) The boxplot of the accuracy when allowing up to 1 RASS level difference.

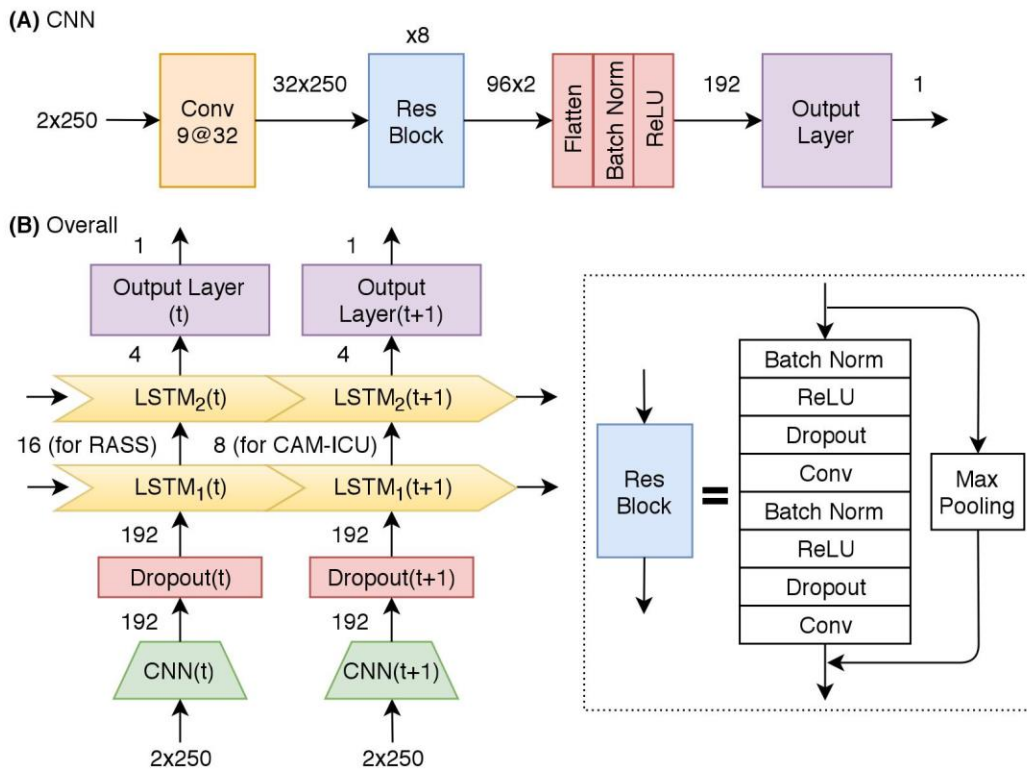

**Supplementary Figure 9.** Model architecture. (a) CNN architecture. The numbers such as “2x250” indicates there are 2 channels, and each channel has 250 sample points. “9@32” means in the convolutional layer, the filter size is 9 and the number of filters is 32. (b) The overall architecture. There are 2 layers of LSTM on top of CNN, which integrates the CNN outputs (not including the output layer in CNN) along time.

## Supplementary Tables

**Supplementary Table 1.** Richmond agitation-sedation scale (RASS)<sup>2</sup>

| Score | Term              | Description                                                                                    |
|-------|-------------------|------------------------------------------------------------------------------------------------|
| +4    | Combative         | Violent, immediate danger to staff                                                             |
| +3    | Very agitation    | Pulls on or removes tube(s) or catheter(s) or has aggressive behavior toward staff             |
| +2    | Agitated          | Frequent non-purposeful movement or patient-ventilator dyssynchrony                            |
| +1    | Restless          | Anxious or apprehensive but movements not aggressive or vigorous                               |
| 0     | Alert and calm    |                                                                                                |
| -1    | Drowsy            | Not fully alert, but has sustained (more than 10 seconds) awakening, with eye contact to voice |
| -2    | Light sedation    | Briefly (less than 10 seconds) awakens with eye contact to voice                               |
| -3    | Moderate sedation | Any movement (but no eye contact) to voice                                                     |
| -4    | Deep sedation     | No response to voice, but some movement to physical stimulation                                |
| -5    | Unarousable       | No response to voice or physical stimulation                                                   |

**Supplementary Table 2.** Confusion Assessment Method for the ICU (CAM-ICU)<sup>3</sup>

| Feature                                                                                                      | Criteria                                                                                                                                                                         |
|--------------------------------------------------------------------------------------------------------------|----------------------------------------------------------------------------------------------------------------------------------------------------------------------------------|
| Only proceed if RASS $\geq$ -3.<br>Otherwise not be able to assess. In this study, we set to delirium = YES. |                                                                                                                                                                                  |
| Feature 1:<br>Acute Onset or Fluctuating Course                                                              | Patient different than baseline, pre-hospital mental status.<br>OR<br>Patient with fluctuating mental status in past 24 hours by fluctuation of level of consciousness/sedation. |
| Feature 2:<br>Inattention                                                                                    | Letters attention test with >2 errors: Patient squeezes your hand when the letter A is spoken. Error is missing an A or squeezing without an A. Say C-A-S-A-B-L-A-N-C-A.         |
| Feature 3:<br>Altered Level of Consciousness                                                                 | RASS is not 0 (alert and calm).                                                                                                                                                  |
| Feature 4:<br>Disorganized Thinking                                                                          | >1 Error questions and commands.                                                                                                                                                 |
| Delirium = Feature 1 AND Feature 2 AND (Feature 3 OR Feature 4)                                              |                                                                                                                                                                                  |

## Supplementary Reference

1. Rennie, J. D. & Srebro, N. Loss functions for preference levels: Regression with discrete ordered labels. in *Proceedings of the IJCAI multidisciplinary workshop on advances in preference handling* 180–186 (Kluwer Norwell, MA, 2005).
2. Sessler, C. N. *et al.* The Richmond Agitation–Sedation Scale: validity and reliability in adult intensive care unit patients. *American journal of respiratory and critical care medicine* **166**, 1338–1344 (2002).
3. Ely, E. W. *et al.* Evaluation of delirium in critically ill patients: validation of the Confusion Assessment Method for the Intensive Care Unit (CAM-ICU). *Critical care medicine* **29**, 1370–1379 (2001).
